# Supplementary material for: The ubiquitin specific protease USP34 promotes ubiquitin signaling at DNA double-strand breaks
Source: PubMed Central journal article supplement (PMC3794584; doi:10.1093/nar/gkt622), 2013-07-17

## Supplemental Figure Caption

### Supplemental Figure 1. Role of USP34 in DNA Damage-Repair

**A & B)** siRNA-treated HeLa cells were left un-irradiated (no IR) or irradiated (3 Gy), fixed at indicated time points and were subsequently processed for indirect immunofluorescence experiments using anti- $\gamma$ H2AX antibodies. Percentage of  $\gamma$ H2AX-positive cells (out of a total of 100 nuclei) is plotted (**B**). Experiment was repeated twice, **C)** DR-U2OS cells pre-treated with indicated siRNAs were transfected with expression construct encoding the IScel endonuclease. 48 hr post-transfection the percentage of GFP positive cells was analysed by flow cytometry. PALB2, a homology-directed DNA repair protein, was used as positive control, **D)** HeLa cells treated with indicated siRNAs were irradiated with increasing doses of IR (0,1,5,10 Gy), lysed 1 hr post IR treatment and Western blotting experiments were performed using indicated antibodies.

### Supplemental Figure 2. Chemical inhibition of ATM inhibited USP34 IRIF formation

HeLa cells grown on overslips were incubated with DMSO or ATM inhibitor KU55933 (10  $\mu$ M) for 4 hr before IR treatment. Cells were processed for immunofluorescence studies using indicated antibodies. Nuclei was counterstained with DAPI.

### Supplemental Figure 3. Effective siRNA-mediated knockdown of DSB repair proteins

HeLa cells were transfected twice at 24 hr intervals with indicated siRNAs. 48 hr post-transfection cells were harvested and whole cell extracts were prepared for Western blotting experiments using indicated antibodies.

### Supplemental Figure 4. RNF169 inhibited USP34 IRIF formation

U2OS cells ectopically expressing Flag-tagged RNF169 were irradiated and processed for immunofluorescence studies using indicated antibodies. Cell nuclei were counterstained with DAPI.

### Supplemental Figure 5. Quantitative analyses of RNF168 proteins

**A-C)** Relative expression of RNF168 proteins (**A & C**) or its ubiquitylated species (**B**) was determined using ImageJ software. Values represent mean $\pm$ S.E.M. from at least two independent experiments.

### Supplemental Figure 6. Role of 53BP1 in IR-induced stabilization of RNF168 proteins

HeLa cells pre-incubated with indicated siRNAs were irradiated (10 Gy) or left untreated. 4 hr post IR cells were lysed and whole cell extracts were separated by

SDS-PAGE. Expression of RNF168 was determined by Western blotting.

**Supplemental Figure 7.** Ectopically expressed RNF168 promoted DSB-ubiquitylation in USP34-depleted cells

U2OS cells pre-treated with USP34-targeting siRNAs were transfected with Flag-RNF18 expression constructs. 24 hr post-transfection cells were irradiated (3 Gy, 1 hr) and processed for immunofluorescence studies using indicated antibodies. Efficient knockdown of USP34 was validated by Western blotting using anti-USP34 antibodies.

A

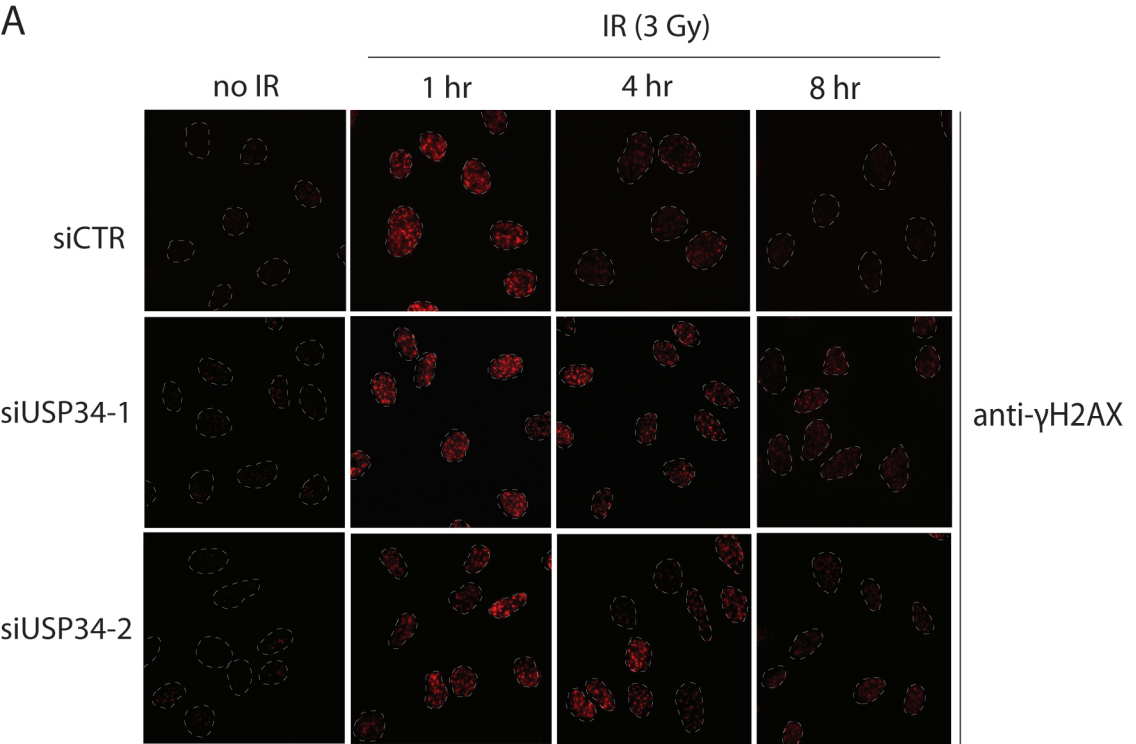

B

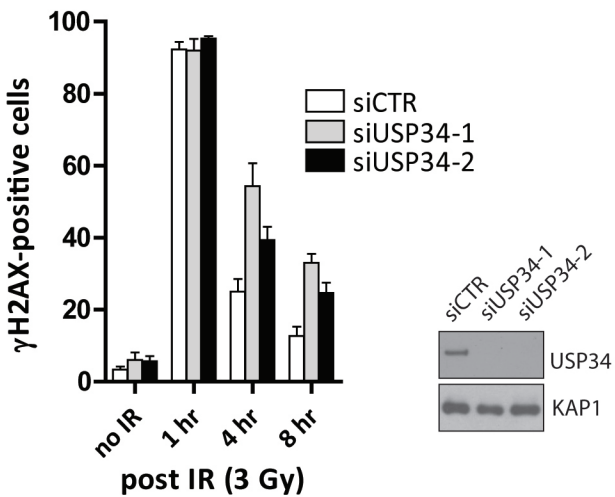

C

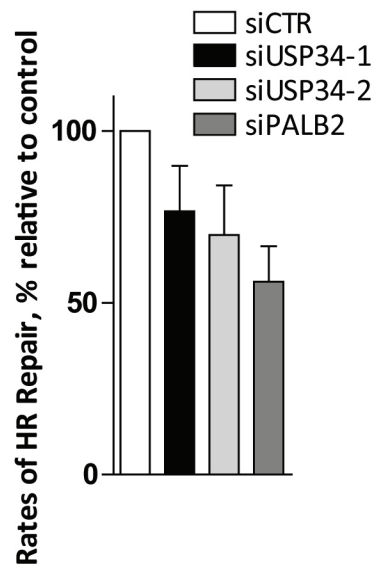

D

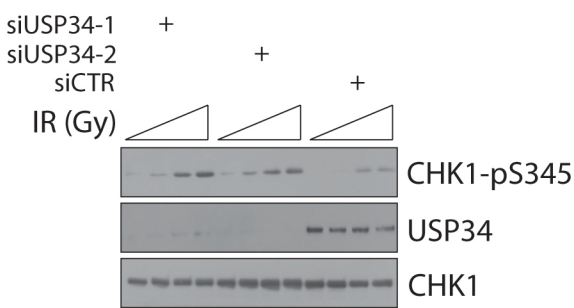

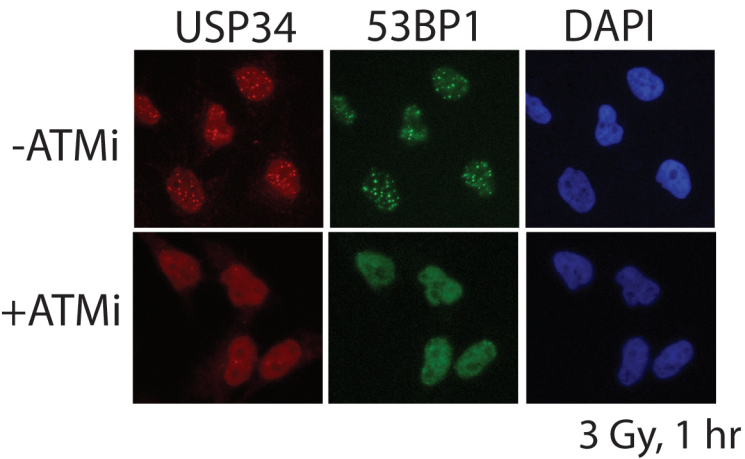

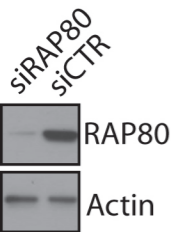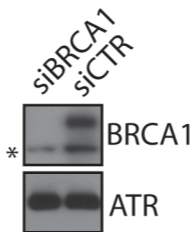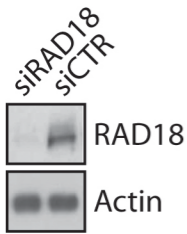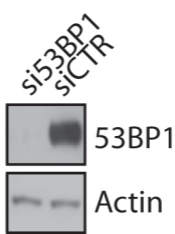

Flag (RNF169)

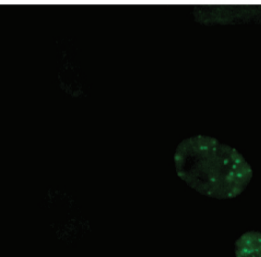

USP34

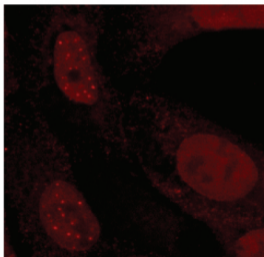

DAPI

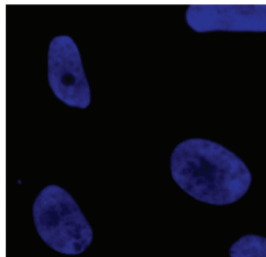

10 Gy, 4 hr

A

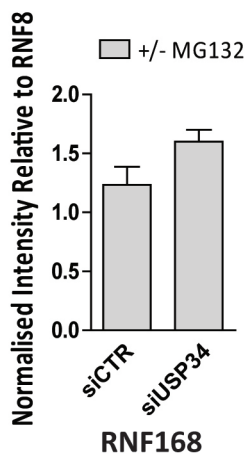

B

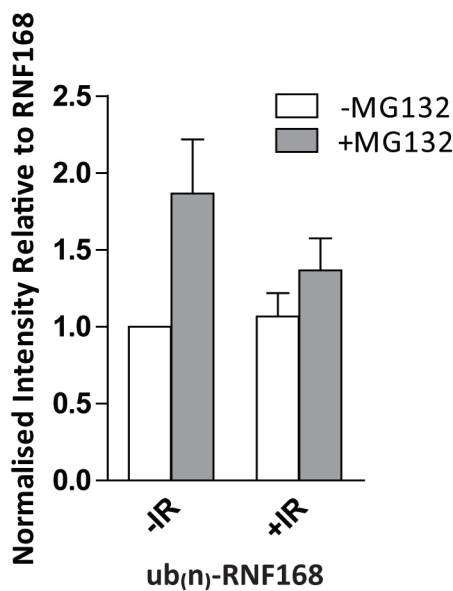

C

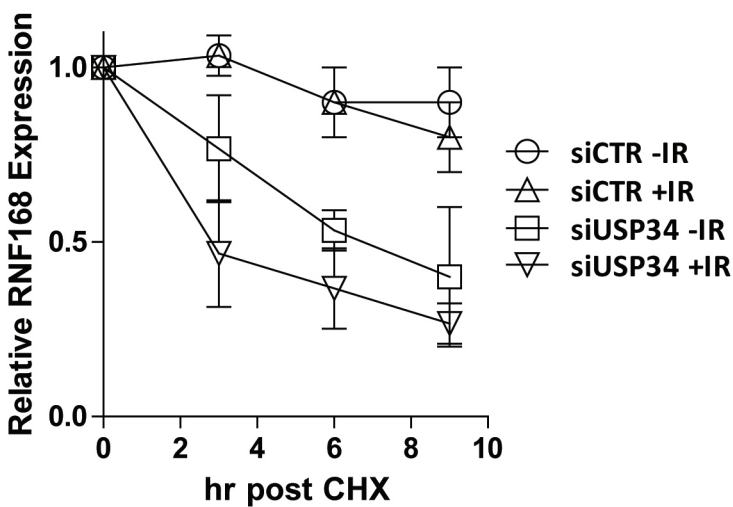

# Sy\_Supp Fig 6

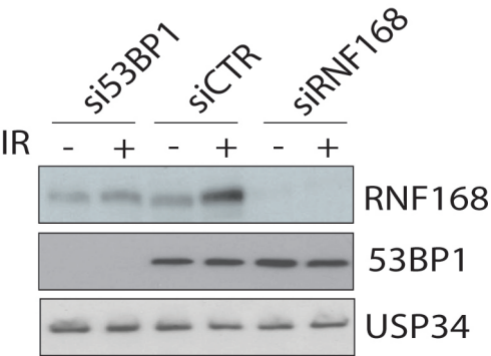



Flag (RNF168)

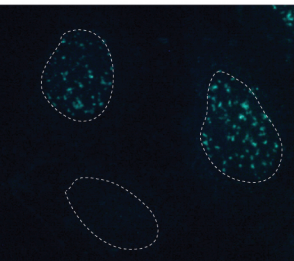

FK2

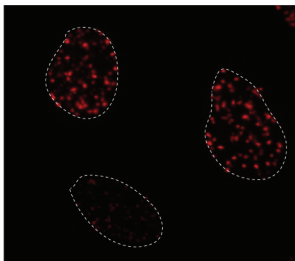

Flag (RNF168)

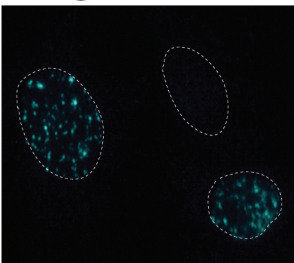

uH2A

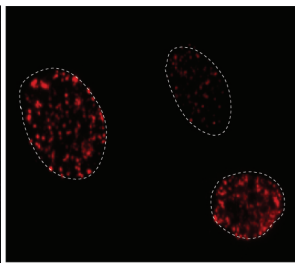

siCTR  
siUSP34

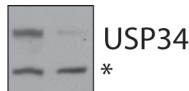

Supplement: supp_gkt622_nar-03338-d-2012-File008.pdf [file supp_gkt622_nar-03338-d-2012-File008.pdf]
